# Supplementary material
Source: publisher figshare collection journal article supplement (https://gsapubs.figshare.com/ndownloader/files/31676873)
Supplement: Supplementary file 1 [file 31676873]

## Sheet: Standard data
STANDARD DATA
Standard MongOl Sh11-2			Measured 20 times during the EPMA study										Measured 25 times during the LA-ICP-MS study
		Mean
wt%	Recom	Measured	Std. dev.		Wt.% Analytical uncertainty for Commondale olivines*								ppm	Recom.	Recom. sd.	Meas. Avg.	Meas. Sd.
SiO2	40.74	40.58	0.2		Si	0.24							Al	245	34	224	27
Al2O3	0.05	0.05	0.0035		Al	0.006							Ca	688	59	711	54
FeO	10.17	10.39	0.05		Fe	0.081							Cr	125	9	124	11
MnO	0.14	0.14	0.006		Mn	0.016
MgO	48.79	48.4	0.25		Mg	0.33
CaO	0.1	0.1	0.002		Ca	0.01
Cr2O3	0.02	0.02	0.008		Cr	0.018
NiO	0.36	0.37	0.006		Ni	0.013
Total	100.37	100.05
					* Taken as the average of the 2σ standard deviation of the count data

## Sheet: EPMA data 
OLIVINE COMPOSITION DATA
Detailed profile (Fig. 1)				Analyses in wt.%		Sample 69.7 m crystal 2
Position	13	12	11	10	9	8	7	6	5	4	3	2	1	14	15	16
SiO2	39.76	39.76	40	40.2	40.5	40.67	40.67	40.9	41.49	41.3	41.41	41.32	41.3	41.43	41.37	41.15
TiO2	n.d.	0.008	n.d.	n.d.	n.d.	0.005	n.d.	n.d.	0.008	n.d.	0.003	n.d.	n.d.	n.d.	n.d.	n.d.
Al2O3	0.026	0.07	0.14	0.19	0.2	0.198	0.215	0.215	0.203	0.221	0.212	0.211	0.243	0.225	0.21	0.22
Cr2O3	0.139	0.241	0.29	0.33	0.34	0.319	0.343	0.33	0.319	0.334	0.335	0.34	0.35	0.35	0.33	0.345
FeO	13.1	12.56	11.2	10.8	9.2	8.56	7.81	6.81	5.46	5.43	5.53	5.1	5.3	5.12	5.09	5.14
MnO	0.195	0.188	0.168	0.165	0.14	0.123	0.118	0.099	0.072	0.076	0.076	0.08	0.082	0.083	0.082	0.083
MgO	46.2	46.35	47.6	48	49.2	49.89	50.13	51.2	52.06	52.25	51.93	52.3	52.4	52.35	52.35	52.3
NiO	0.295	0.336	0.346	0.356	0.353	0.355	0.368	0.369	0.375	0.379	0.366	0.37	0.374	0.372	0.37	0.369
CaO	0.083	0.11	0.102	0.12	0.12	0.117	0.105	0.11	0.122	0.115	0.114	0.11	0.12	0.115	0.1	0.115
Total	99.79	99.62	99.85	100.16	100.05	100.24	99.75	100.03	100.12	100.11	99.97	99.83	100.17	100.05	99.9	99.72
Fo	86.3	86.8	88.3	88.8	90.5	91.2	92	93.1	94.4	94.5	94.4	94.8	94.6	94.8	94.8	94.8
	(Fig. 2) Series 69.7 m crystal 3
SiO2	42.25	42.19	42.18	42.16	42.15	41.98	41.34	40.62	40.38
Al2O3	0.1	0.15	0.114	0.088	0.092	0.077	0.081	0.066	0.06
Cr2O3	0.214	0.217	0.229	0.211	0.209	0.197	0.215	0.2	0.188
FeO	4	3.96	4	3.94	4.26	4.78	7.63	11.03	12.75
MnO	0.058	0.08	0.07	0.074	0.074	0.075	0.101	0.167	0.181
MgO	53.13	52.95	53.29	53.08	53.1	52.71	50.71	48.02	46.26
NiO	0.4	0.394	0.397	0.397	0.404	0.389	0.386	0.34	0.329
CaO	0.133	0.166	0.147	0.101	0.133	0.11	0.136	0.091	0.102
Total	100.28	100.1	100.42	100.05	100.41	100.31	100.59	100.53	100.25
Fo	95.9	96	96	96	95.7	95.2	92.2	88.6	86.6
	(Fig. 2) Series 69.7 m crystal 5		wt.%
SiO2	41.82	41.81	41.71	41.68	41.49	41.41	40.94	40.61	40.61	40.48	40.41
Al2O3	0.267	0.267	0.272	0.269	0.275	0.271	0.267	0.241	0.2	0.15	0.064
Cr2O3	0.358	0.38	0.392	0.373	0.388	0.349	0.36	0.362	0.335	0.3	0.252
FeO	4.91	5.11	5.01	5.61	5.97	7.01	8.84	11.2	11.97	12.06	12.27
MnO	0.084	0.059	0.069	0.068	0.085	0.086	0.118	0.141	0.166	0.16	0.17
MgO	52.27	52.22	52.36	51.63	51.48	50.73	49.23	46.7	46.32	46.39	46.42
NiO	0.398	0.386	0.395	0.398	0.385	0.382	0.366	0.36	0.346	0.351	0.344
CaO	0.113	0.121	0.116	0.129	0.113	0.118	0.118	0.138	0.119	0.11	0.115
Total	100.22	100.36	100.33	100.15	100.18	100.35	100.23	99.75	100.06	100	100.05
Fo	94.99	94.79	94.9	94.25	93.89	92.81	90.85	88.14	87.33	87.27	87.08
	(Fig. 2) Series 69.7 m crystal 10
SiO2	40.41	40.74	41.45	41.5	41.14	41.48	40.42
Al2O3	0.061	0.135	0.131	0.141	0.135	0.133	0.121
Cr2O3	0.227	0.26	0.314	0.316	0.285	0.273	0.265
FeO	12.3	10.63	5.68	5.23	7.15	7.98	11.94
MnO	0.162	0.148	0.086	0.085	0.099	0.096	0.159
MgO	46.21	47.5	51.86	52	50.34	49.47	47.01
NiO	0.351	0.364	0.401	0.398	0.388	0.381	0.359
CaO	0.105	0.11	0.112	0.109	0.101	0.12	0.111
Total	99.83	99.89	100.04	99.78	99.64	99.93	100.4
Fo	87	88.8	94.2	94.7	92.6	91.7	87.5
	(Fig. 2)Series 69.7 m crystal 12		wt.%
SiO2	42	41.84	41.8	41.87	41.6	41.28	40.85	40.64	40.55	40.51	40.52
Al2O3	0.298	0.301	0.291	0.279	0.284	0.278	0.284	0.248	0.189	0.07	0.051
Cr2O3	0.375	0.377	0.388	0.368	0.38	0.369	0.372	0.368	0.323	0.258	0.249
FeO	3.9	4.6	4.11	5.21	6.01	7.28	9.71	10.94	11.2	11.71	12.01
MnO	0.064	0.059	0.069	0.068	0.085	0.086	0.118	0.142	0.166	0.172	0.17
MgO	53.3	52.5	53.05	52.22	51.48	50.22	48.2	47.22	46.91	46.6	46.53
NiO	0.402	0.391	0.397	0.388	0.385	0.376	0.381	0.361	0.342	0.337	0.348
CaO	0.116	0.119	0.125	0.131	0.115	0.123	0.127	0.112	0.121	0.117	0.115
Total	100.46	100.19	100.23	100.54	100.34	100.01	100.04	100.03	99.8	99.77	100
Fo	96.1	95.3	95.8	94.7	93.9	92.5	89.8	88.5	88.2	87.6	87.3
	(Fig. 2) Series 23.62 m crystal 6		wt.%
SiO2	41.23	41.42	41.15	41.31	41.1	40.82	40.64	40.32	40.27	40.02	40.08	39.79
Al2O3	0.229	0.221	0.228	0.237	0.232	0.236	0.206	0.197	0.114	0.082	0.082	0.074
Cr2O3	0.323	0.318	0.324	0.325	0.332	0.321	0.332	0.345	0.221	0.229	0.229	0.213
FeO	4.76	4.76	5.04	5.35	6.25	7.06	8.07	8.7	9.71	10.03	10.93	11.19
MnO	0.081	0.07	0.076	0.068	0.086	0.092	0.099	0.11	0.125	0.125	0.138	0.151
MgO	52.6	52.71	52.48	52.05	51.58	50.7	49.96	49.64	49.08	48.89	48	48
NiO	0.405	0.394	0.386	0.389	0.389	0.382	0.373	0.368	0.37	0.368	0.359	0.368
CaO	0.12	0.122	0.119	0.128	0.122	0.123	0.114	0.122	0.141	0.13	0.129	0.123
Total	99.74	100.02	99.81	99.86	100.08	99.74	99.79	99.8	100.02	99.88	99.95	99.91
Fo	95.2	95.2	94.9	94.5	93.6	92.7	91.7	91	90	89.7	88.7	88.4
	(Fig. 2) Series 23.62 m crystal 3		wt.%
SiO2	41.37	41.72	41.46	41.36	40.96	40.37	40.07	39.9
Al2O3	0.186	0.159	0.171	0.175	0.182	0.168	0.177	0.043
Cr2O3	0.287	0.249	0.279	0.276	0.294	0.286	0.289	0.128
FeO	4.32	3.99	4.17	4.32	6.34	8.26	9.96	11.52
MnO	0.058	0.048	0.064	0.081	0.095	0.099	0.129	0.143
MgO	53.14	53.16	53.17	53.05	51.5	50.22	48.96	47.94
NiO	0.391	0.387	0.401	0.387	0.387	0.371	0.368	0.375
CaO	0.148	0.136	0.128	0.149	0.139	0.126	0.143	0.09
Total	99.91	99.85	99.84	99.79	99.89	99.9	100.1	100.1
Fo	95.6	96	95.8	95.6	93.5	91.6	89.8	88.1
	(Fig. 2) Series 23.62 m crystal 6A		wt.%
SiO2	41.82	41.81	41.65	41.25	40.91	40.71
Al2O3	0.121	0.11	0.122	0.115	0.102	0.07
Cr2O3	0.255	0.243	0.242	0.248	0.244	0.207
FeO	4.71	4.78	5.56	7.95	9.46	11.12
MnO	0.055	0.063	0.071	0.1	0.123	0.151
MgO	52.43	52.42	51.54	49.79	48.34	46.91
NiO	0.396	0.388	0.396	0.382	0.369	0.371
CaO	0.114	0.113	0.123	0.12	0.118	0.113
Total	99.91	99.92	99.7	99.95	99.64	99.63
Fo	95.2	95.1	94.3	91.8	90.1	88.3
			(Fig. 2) All other Commondale olivine data
	wt.%
Sample ID	SiO2	Al2O3	FeO	MnO	MgO	CaO	Cr2O3	NiO	Total	Fo
44.13	41.8	0.077	4.37	0.072	52.71	0.147	0.211	0.388	99.77	95.6
44.13	41.78	0.079	4.51	0.063	52.59	0.139	0.207	0.393	99.77	95.4
44.13	41.38	0.074	6.38	0.08	51.08	0.108	0.202	0.375	99.68	93.4
44.13	40.12	0.095	12.21	0.179	46.43	0.104	0.189	0.317	99.64	87.1
44.13	41.82	0.159	4.34	0.069	52.54	0.167	0.231	0.381	99.7	95.6
44.13	41.64	0.163	4.34	0.072	52.59	0.14	0.24	0.378	99.56	95.6
44.13	41.57	0.128	5.7	0.081	51.74	0.134	0.242	0.384	99.97	94.2
44.13	40.53	0.1	10.41	0.152	48.53	0.113	0.254	0.343	100.43	89.3
44.13	39.75	0.078	12.73	0.181	46.3	0.132	0.274	0.319	99.77	86.6
44.13	41.65	0.13	4.27	0.084	52.75	0.1	0.259	0.382	99.63	95.7
44.13	41.68	0.144	4.27	0.069	52.84	0.108	0.281	0.396	99.79	95.7
44.13	41.57	0.133	5.58	0.082	51.52	0.13	0.273	0.385	99.67	94.3
44.13	41.02	0.139	8.12	0.103	49.79	0.113	0.254	0.347	99.87	91.6
44.13	40.08	0.074	12.66	0.176	46.14	0.103	0.274	0.284	99.79	86.7
44.13	41.76	0.182	4.32	0.076	52.72	0.151	0.268	0.378	99.85	95.6
44.13	41.44	0.15	4.56	0.073	52.7	0.141	0.249	0.386	99.7	95.4
44.13	41.76	0.165	4.35	0.068	52.45	0.155	0.254	0.375	99.58	95.6
44.13	40.99	0.141	6.65	0.088	50.77	0.114	0.27	0.381	99.41	93.2
44.13	40.46	0.131	10.18	0.144	48.28	0.112	0.268	0.344	99.92	89.4
44.13	39.91	0.068	12.86	0.211	46.06	0.048	0.155	0.295	99.6	86.5
44.13	41.78	0.101	4.23	0.061	52.75	0.126	0.238	0.395	99.68	95.7
44.13	41.82	0.089	4.21	0.067	52.71	0.132	0.244	0.387	99.66	95.7
44.13	41.09	0.087	7.61	0.1	49.89	0.102	0.229	0.375	99.48	92.1
44.13	40.62	0.098	10.3	0.132	47.98	0.129	0.237	0.344	99.84	89.3
44.13	40.46	0.079	10.85	0.145	47.53	0.122	0.264	0.333	99.79	88.6
44.13	41.62	0.198	4.5	0.07	52.28	0.136	0.283	0.39	99.48	95.4
44.13	41.6	0.166	4.44	0.067	52.27	0.113	0.28	0.384	99.31	95.5
44.13	41.47	0.277	4.55	0.08	52.22	0.121	0.329	0.374	99.42	95.3
44.13	41.51	0.19	4.63	0.082	52.11	0.153	0.289	0.369	99.33	95.2
44.13	41.49	0.134	5.63	0.073	51.68	0.106	0.252	0.38	99.75	94.2
44.13	40.25	0.116	10.09	0.157	48.31	0.095	0.268	0.357	99.64	89.5
44.13	40.02	0.135	12.03	0.18	47.06	0.101	0.269	0.343	100.13	87.5
45.11	41.51	0.097	5.83	0.071	51.72	0.129	0.245	0.379	99.99	94
45.11	41.78	0.074	6.22	0.095	50.92	0.125	0.217	0.382	99.81	93.6
45.11	41.39	0.096	6.35	0.088	51.59	0.119	0.264	0.37	100.27	93.5
45.11	40.95	0.081	9.35	0.139	48.92	0.125	0.249	0.379	100.19	90.3
45.11	40.64	0.066	11.28	0.184	47.54	0.085	0.255	0.355	100.4	88.3
45.11	40.29	0.056	11.95	0.196	46.93	0.051	0.238	0.358	100.07	87.5
90.24	41.71	0.135	6.15	0.081	51.36	0.132	0.224	0.387	100.18	93.7
90.24	41.96	0.085	6.3	0.084	51.42	0.122	0.163	0.386	100.51	93.6
90.24	42	0.142	5.42	0.069	51.91	0.122	0.177	0.374	100.22	94.5
90.24	42.16	0.114	5.22	0.08	52.21	0.128	0.167	0.388	100.46	94.7
90.24	41.71	0.078	6.07	0.09	51.77	0.1	0.158	0.382	100.37	93.8
90.24	41.86	0.138	6.46	0.092	51.4	0.141	0.175	0.377	100.6	93.4
90.24	41.76	0.131	6.19	0.079	51.69	0.096	0.185	0.38	100.52	93.7
90.24	40.98	0.096	9.56	0.128	49.22	0.089	0.152	0.345	100.57	90.2
90.24	40.77	0.101	10.3	0.149	48.42	0.082	0.161	0.327	100.31	89.3
90.24	40.42	0.122	11.7	0.154	47.43	0.11	0.159	0.31	100.4	87.8
90.24	39.89	0.107	12.9	0.193	46.7	0.106	0.139	0.265	100.29	86.6
90.24	42.05	0.158	4.22	0.07	52.98	0.068	0.277	0.366	100.18	95.7
90.24	41.87	0.202	4.13	0.073	52.82	0.082	0.29	0.366	99.76	95.8
90.24	41.91	0.185	4.11	0.08	53.33	0.078	0.277	0.367	100.33	95.9
90.24	41.76	0.2	4.21	0.062	53.24	0.089	0.269	0.357	100.19	95.7
90.24	41.92	0.193	4.15	0.07	53.1	0.093	0.253	0.371	100.15	95.8
90.24	41.72	0.185	4.55	0.067	52.91	0.094	0.281	0.36	100.17	95.4
90.24	42.1	0.152	4.29	0.073	52.95	0.087	0.284	0.365	100.3	95.7
90.24	41.48	0.171	6.33	0.091	51.13	0.099	0.232	0.378	99.91	93.5
90.24	41	0.179	9.26	0.117	48.27	0.108	0.254	0.36	99.55	90.3
90.24	41.13	0.115	10.25	0.136	47.34	0.1	0.201	0.362	99.63	89.2
105.66	41.49	0.121	5.78	0.077	51.51	0.114	0.3	0.392	99.78	94.1
105.66	41.21	0.115	5.92	0.086	50.94	0.079	0.291	0.393	99.04	93.9
105.66	41.37	0.12	5.92	0.08	50.76	0.038	0.284	0.392	98.9	93.9
105.66	41.61	0.157	5.02	0.077	51.56	0.121	0.267	0.402	99.21	94.8
105.66	41.48	0.141	5.22	0.076	51.71	0.11	0.29	0.387	99.42	94.6
105.66	41.09	0.119	8.19	0.118	49.6	0.092	0.312	0.387	99.9	91.5
105.66	39.92	0.14	10.61	0.173	46.65	0.09	0.319	0.338	98.24	88.7
107.2	41.39	0.141	4.79	0.08	52.47	0.121	0.308	0.403	99.71	95.1
107.2	41.3	0.179	4.84	0.078	52.63	0.149	0.304	0.404	99.88	95.1
107.2	41.52	0.149	5.02	0.086	51.84	0.1	0.257	0.4	99.38	94.8
110.65	41.35	0.231	5.23	0.078	51.79	0.116	0.353	0.395	99.61	94.6
110.65	40.89	0.119	8.12	0.118	49.45	0.11	0.243	0.368	99.42	91.6
110.65	41.45	0.195	5.43	0.072	51.61	0.112	0.327	0.391	99.58	94.4
110.65	41.5	0.236	4.78	0.08	52.11	0.123	0.38	0.401	99.61	95.1
110.65	41.42	0.235	4.82	0.073	52.12	0.109	0.364	0.41	99.54	95.1
110.65	41.72	0.07	4.4	0.074	52.51	0.098	0.235	0.401	99.51	95.5
110.65	41.52	0.08	4.46	0.072	52.59	0.117	0.246	0.408	99.49	95.5
110.65	41.78	0.091	4.47	0.068	52.52	0.127	0.252	0.406	99.72	95.4
110.65	41.65	0.093	4.58	0.086	52.49	0.107	0.222	0.412	99.63	95.3
110.65	41.68	0.081	4.52	0.069	52.5	0.113	0.226	0.409	99.6	95.4
110.65	41.72	0.091	5.24	0.072	51.91	0.135	0.246	0.4	99.81	94.6
110.65	41.27	0.071	7.58	0.117	49.84	0.105	0.215	0.397	99.6	92.1
110.65	41.09	0.053	8.71	0.145	48.6	0.12	0.183	0.372	99.28	90.9
110.65	40.85	0.057	9.29	0.151	48.15	0.1	0.206	0.34	99.14	90.2
110.65	41.38	0.107	5.7	0.084	51.58	0.088	0.25	0.389	99.58	94.2
110.65	41.37	0.142	6.17	0.084	51.18	0.105	0.257	0.382	99.69	93.7
110.65	41.01	0.147	7.65	0.117	49.21	0.1	0.3	0.383	98.92	92
143.78	42.37	0.071	4.51	0.072	52.45	0.138	0.155	0.393	100.15	95.4
143.78	42.4	0.094	4.64	0.071	52.5	0.141	0.154	0.396	100.39	95.3
143.78	42.3	0.055	4.65	0.085	52.48	0.131	0.202	0.405	100.3	95.3
143.78	40.59	0.04	12.02	0.216	47.07	0.05	0.173	0.33	100.48	87.5
143.78	40.6	0.026	12.4	0.222	46.37	0.06	0.151	0.318	100.14	87
143.78	41.92	0.079	5.28	0.067	52.44	0.064	0.258	0.401	100.51	94.7
143.78	41.99	0.092	5.15	0.077	52.43	0.104	0.263	0.397	100.5	94.8
143.78	41.19	0.087	9.69	0.145	48.45	0.08	0.264	0.377	100.28	89.9
143.78	40.66	0.054	12.57	0.224	46.32	0.024	0.211	0.332	100.4	86.8
143.78	41.95	0.159	4.49	0.078	52.58	0.083	0.266	0.383	99.99	95.4
143.78	41.79	0.175	4.46	0.067	52.87	0.14	0.328	0.394	100.22	95.5
143.78	41.91	0.1	4.55	0.069	53.14	0.061	0.278	0.394	100.5	95.4
143.78	42.01	0.123	4.65	0.077	52.72	0.072	0.301	0.386	100.34	95.3
143.78	41.38	0.133	7.71	0.114	50.21	0.067	0.291	0.379	100.29	92.1
143.78	40.98	0.13	9.49	0.158	48.15	0.106	0.262	0.363	99.64	90
143.78	40.5	0.043	12.39	0.219	46.65	0.06	0.17	0.334	100.37	87
143.78	40.7	0.12	10.25	0.175	47.82	0.098	0.261	0.358	99.79	89.3
143.78	41.32	0.099	7.74	0.124	50.2	0.058	0.285	0.38	100.2	92
143.78	41.85	0.186	4.67	0.082	52.87	0.096	0.301	0.382	100.43	95.3
143.78	42.21	0.11	4.4	0.066	52.64	0.142	0.281	0.396	100.24	95.5
143.78	42.31	0.196	4.28	0.062	52.51	0.13	0.3	0.413	100.19	95.6
143.78	42.24	0.097	4.38	0.073	52.53	0.135	0.259	0.409	100.13	95.5
143.78	41.89	0.121	4.58	0.064	52.41	0.107	0.263	0.409	99.84	95.3
143.78	41.08	0.106	8.99	0.152	49.12	0.108	0.255	0.396	100.2	90.7
143.78	41.18	0.098	8.93	0.122	48.97	0.085	0.267	0.389	100.03	90.7
143.78	40.27	0.125	11.19	0.192	48.02	0.1	0.234	0.375	100.51	88.4
143.78	40.33	0.11	12.18	0.213	47.09	0.087	0.24	0.333	100.59	87.3
COM01-26	41.78	0.127	5.42	0.079	51.98	0.146	0.19	0.374	100.1	94.5
COM01-26	41.26	0.114	6.02	0.074	51.99	0.15	0.19	0.371	100.17	93.9
COM01-26	41.4	0.088	5.73	0.068	52.26	0.114	0.176	0.366	100.2	94.2
COM01-26	41.25	0.115	8.15	0.094	49.5	0.117	0.205	0.362	99.79	91.5
COM01-26	41.53	0.092	8.15	0.11	49.4	0.116	0.213	0.36	99.94	91.5
COM01-26	41.4	0.109	9.13	0.111	48.37	0.128	0.192	0.363	99.79	90.4
COM01-26	39.96	0.097	12.2	0.155	46.87	0.11	0.261	0.376	100.02	87.3
COM01-26	41.79	0.106	5.59	0.078	51.56	0.143	0.14	0.371	99.76	94.3
COM01-26	41.5	0.12	5.7	0.081	51.44	0.139	0.158	0.361	99.52	94.1
COM01-26	42.1	0.124	5.17	0.071	51.37	0.125	0.156	0.379	99.49	94.7
COM01-26	40.19	0.103	9.8	0.127	48.82	0.128	0.188	0.383	99.74	89.9
COM01-26	39.65	0.108	10.14	0.118	49.55	0.059	0.19	0.372	100.3	89.7
COM01-26	41.69	0.095	5.42	0.08	51.89	0.123	0.207	0.378	99.89	94.5
COM01-26	41.6	0.125	5.47	0.071	51.85	0.161	0.229	0.389	99.89	94.4
COM01-26	40.15	0.096	10.61	0.131	47.93	0.096	0.216	0.373	99.61	89
COM01-26	39.93	0.091	11.89	0.147	47.5	0.11	0.163	0.363	100.22	87.7
COM01-26	41.67	0.155	5.04	0.07	52.03	0.106	0.281	0.392	99.74	94.8
COM01-26	41.76	0.14	5.16	0.067	52.05	0.111	0.253	0.402	99.94	94.7
COM01-26	41.56	0.154	5.1	0.072	52.13	0.119	0.283	0.398	99.81	94.8
COM01-26	41.51	0.164	5.96	0.067	51.4	0.121	0.28	0.385	99.89	93.9
COM01-26	40.74	0.153	9.77	0.129	48.32	0.11	0.27	0.375	99.87	89.8
COM01-26	40.4	0.12	11.04	0.129	47.37	0.11	0.228	0.363	99.76	88.4
COM01-26	41.39	0.122	5.48	0.076	52.06	0.13	0.227	0.382	99.87	94.4
COM01-26	41.63	0.09	5.84	0.078	51.82	0.097	0.193	0.385	100.14	94.1
COM01-26	40.17	0.135	10.74	0.145	47.67	0.143	0.227	0.378	99.61	88.8
COM01-26	40.91	0.176	8.79	0.111	49	0.124	0.3	0.366	99.77	90.9
COM01-26	41.41	0.12	5.21	0.077	52.05	0.104	0.29	0.4	99.66	94.7
COM01-26	41.43	0.139	6.51	0.08	50.34	0.129	0.256	0.391	99.27	93.2
COM01-26	40.76	0.114	9.77	0.125	48.47	0.087	0.236	0.363	99.92	89.8
COM01-26	41.75	0.179	4.6	0.074	52.56	0.151	0.255	0.374	99.94	95.3
COM01-26	41.73	0.191	4.48	0.059	52.75	0.151	0.262	0.379	100.01	95.4
COM01-26	40.95	0.171	7.89	0.094	50.19	0.14	0.254	0.375	100.06	91.9
COM01-26	40.37	0.15	9.74	0.113	48.75	0.098	0.265	0.366	99.86	89.9
COM01-26	41.37	0.165	4.62	0.06	52.88	0.121	0.248	0.368	99.82	95.3
COM01-26	41.39	0.18	4.58	0.078	52.69	0.145	0.258	0.363	99.68	95.3
COM01-26	40.87	0.138	7.85	0.087	50.3	0.114	0.239	0.372	99.96	91.9
COM01-26	40.24	0.111	10.84	0.151	47.88	0.078	0.238	0.389	99.92	88.7
COM01-9	41.78	0.072	5.01	0.084	52.51	0.06	0.123	0.415	100.05	94.9
COM01-9	41.72	0.047	5.07	0.083	52.16	0.078	0.167	0.406	99.74	94.8
COM01-9	41.78	0.074	5.33	0.085	52.09	0.084	0.161	0.397	100	94.6
COM01-9	41.3	0.047	6.47	0.097	51.2	0.06	0.162	0.384	99.72	93.4
COM18 53	41.5	0.06	6.66	0.073	51.3	0.081	0.216	0.39	100.28	93.2
COM18 53	41.4	0.066	7.14	0.081	50.88	0.079	0.209	0.378	100.24	92.7
COM18 53	41.35	0.058	10	0.123	47.34	0.091	0.17	0.357	99.48	89.4
COM18 53	40.89	0.051	11.58	0.185	46.89	0.087	0.161	0.363	100.2	87.8
COM18 53	41.77	0.184	5.11	0.085	52.2	0.077	0.246	0.355	100.03	94.8
COM18 53	41.9	0.159	4.81	0.07	52.36	0.076	0.233	0.346	99.96	95.1
COM18 53	41.19	0.159	8.21	0.111	50.01	0.078	0.251	0.371	100.37	91.6
COM18 53	39.67	0.141	11.12	0.161	46.33	0.082	0.252	0.37	98.12	88.1
COM18 53	41.79	0.179	5.92	0.087	51.39	0.11	0.264	0.368	100.11	93.9
COM18 53	40.77	0.17	10.09	0.162	47.98	0.108	0.261	0.371	99.92	89.4
COM18 53	40.7	0.054	12.24	0.178	46.3	0.069	0.215	0.357	100.12	87.1
COM18 53	41.22	0.165	7.31	0.102	50.71	0.069	0.277	0.375	100.23	92.5
COM18 53	41.09	0.205	7.24	0.081	50.82	0.128	0.284	0.387	100.24	92.6
COM18 53	41.53	0.175	7.09	0.095	50.91	0.103	0.283	0.379	100.57	92.8
COM18 53	41.47	0.206	7.27	0.086	50.86	0.112	0.285	0.377	100.67	92.6
COM18 53	41.43	0.195	7.21	0.089	50.84	0.093	0.284	0.374	100.51	92.6
COM18 53	41.73	0.097	5.65	0.069	52.32	0.077	0.252	0.374	100.57	94.3
COM18 53	41.54	0.096	5.36	0.078	52.39	0.089	0.252	0.368	100.18	94.6
COM18 53	40.62	0.051	13.44	0.214	45.72	0.107	0.193	0.301	100.65	85.8
COM18 53	41.67	0.087	6.18	0.078	51.55	0.095	0.228	0.364	100.26	93.7
COM18 53	41.49	0.094	6.2	0.083	51.88	0.065	0.201	0.372	100.38	93.7
COM18 53	40.91	0.081	10.47	0.143	48.33	0.092	0.222	0.38	100.63	89.2
69.7	41.74	0.14	6.72	0.092	51.02	0.082	0.27	0.397	100.47	93.1
69.7	42.1	0.144	6.1	0.071	51.54	0.076	0.249	0.391	100.67	93.8
69.7	42	0.133	5.98	0.077	51.68	0.121	0.275	0.392	100.66	93.9
69.7	41.51	0.141	8.02	0.097	49.93	0.118	0.241	0.38	100.44	91.7
69.7	41.35	0.147	8.15	0.103	49.79	0.122	0.25	0.386	100.3	91.6
69.7	41.09	0.097	11.11	0.154	47.63	0.085	0.271	0.377	100.81	88.4
69.7	40.22	0.103	12.49	0.183	46.21	0.108	0.254	0.36	99.92	86.8
69.7	40.08	0.073	13.05	0.21	46.65	0.078	0.226	0.353	100.73	86.4
69.7	40.45	0.15	5.47	0.082	51.34	0.122	0.265	0.385	98.26	94.4
69.7	41.87	0.155	5.36	0.073	52	0.119	0.285	0.398	100.26	94.5
69.7	40.35	0.138	12.28	0.18	46.69	0.123	0.267	0.362	100.39	87.1
69.7	41.58	0.173	5.97	0.08	51.41	0.13	0.283	0.38	100	93.9
69.7	41.45	0.161	6.07	0.072	51.64	0.113	0.265	0.383	100.16	93.8
69.7	40.98	0.159	8.57	0.11	49.4	0.11	0.268	0.382	99.98	91.1
69.7	40.51	0.154	11.07	0.154	47.14	0.11	0.27	0.38	99.78	88.4
69.7	39.5	0.04	13.09	0.205	46.28	0.072	0.152	0.32	99.66	86.3
69.7	41.57	0.164	5.26	0.078	52.33	0.107	0.269	0.379	100.16	94.7
69.7	41.71	0.167	5.28	0.09	52.01	0.108	0.284	0.38	100.02	94.6
69.7	40.17	0.172	7.44	0.101	49.82	0.116	0.269	0.375	98.46	92.3
69.7	40.74	0.162	10.99	0.164	46.99	0.116	0.273	0.341	99.77	88.4
69.7	41.49	0.127	5.21	0.069	52.44	0.102	0.275	0.385	100.09	94.7
69.7	41.06	0.109	9.27	0.111	48.89	0.115	0.261	0.374	100.19	90.4
69.7	40.64	0.041	12.33	0.194	46.47	0.096	0.204	0.343	100.32	87
69.7	41.86	0.152	3.8	0.069	53.34	0.113	0.265	0.395	99.99	96.2
69.7	41.87	0.154	3.83	0.067	53.43	0.065	0.262	0.385	100.05	96.1
69.7	41.84	0.145	3.83	0.063	53.24	0.11	0.267	0.404	99.9	96.1
69.7	40.92	0.136	6.8	0.091	51.34	0.112	0.253	0.385	100.04	93.1
69.7	40.23	0.104	8.74	0.116	50.31	0.112	0.256	0.37	100.24	91.1
69.7	40.04	0.131	9.86	0.129	49.54	0.1	0.24	0.357	100.4	90
69.7	41.75	0.137	3.97	0.06	53.42	0.14	0.206	0.356	100.04	96
69.7	41.82	0.165	3.96	0.058	53.24	0.119	0.24	0.359	99.9	96
69.7	41.76	0.133	4.01	0.079	53.4	0.106	0.212	0.355	100.05	96
69.7	41.69	0.061	4.18	0.074	53.39	0.09	0.213	0.378	100.07	95.8
69.7	41.75	0.078	4.08	0.06	53.35	0.13	0.19	0.39	100.03	95.9
69.7	40.95	0.082	6.7	0.071	51.56	0.107	0.207	0.363	100.03	93.2
69.7	40.31	0.099	10.28	0.133	48.64	0.13	0.206	0.356	100.15	89.4
69.7	39.45	0.06	12.99	0.205	46.63	0.083	0.183	0.321	99.92	86.5
69.7	41.67	0.114	4.03	0.064	53.15	0.141	0.197	0.376	99.74	95.9
69.7	41.58	0.181	4.55	0.073	52.74	0.113	0.289	0.378	99.91	95.4
69.7	41.54	0.191	5.02	0.078	52.5	0.067	0.272	0.389	100.05	94.9
69.7	41.16	0.189	4.79	0.068	52.78	0.126	0.31	0.389	99.81	95.2
69.7	41.15	0.189	4.62	0.062	53.03	0.124	0.3	0.387	99.86	95.3
69.7	40.37	0.186	8.18	0.119	50.55	0.12	0.313	0.368	100.21	91.7
69.7	40.23	0.199	9.94	0.146	48.94	0.131	0.332	0.354	100.27	89.8
69.7	39.78	0.09	12.75	0.201	47.12	0.038	0.197	0.331	100.43	86.8
69.7	39.85	0.065	12.72	0.197	46.79	0.123	0.214	0.317	100.27	86.8
69.7	41.4	0.227	4.05	0.067	53.55	0.109	0.287	0.371	100.05	95.9
69.7	41.43	0.225	3.94	0.068	53.5	0.102	0.286	0.373	99.93	96
69.7	41.39	0.2	3.9	0.071	53.53	0.105	0.275	0.361	99.83	96.1
69.7	41.32	0.212	4.06	0.064	53.46	0.083	0.279	0.37	99.86	95.9
69.7	41.05	0.205	5.38	0.083	52.52	0.118	0.282	0.373	100.01	94.6
69.7	40.4	0.206	7.67	0.101	50.97	0.116	0.308	0.386	100.15	92.2
69.7	39.78	0.21	9.95	0.136	49.04	0.126	0.328	0.376	99.94	89.8
69.7	39.65	0.178	10.32	0.157	49.04	0.123	0.275	0.373	100.11	89.4
69.7	39.43	0.083	10.95	0.16	48.79	0.102	0.219	0.367	100.1	88.8
69.7	39.98	0.058	11.76	0.181	47.42	0.105	0.228	0.352	100.08	87.8
69.7	39.54	0.196	12.75	0.18	46.55	0.097	0.304	0.32	99.94	86.7
69.7	40.06	0.119	12.04	0.179	46.89	0.079	0.303	0.35	100.02	87.4
69.7	39.87	0.057	12.51	0.177	46.68	0.092	0.222	0.34	99.94	86.9
69.7	41.14	0.161	5.45	0.081	52.34	0.116	0.277	0.386	99.95	94.5
69.7	41.44	0.107	3.78	0.057	53.38	0.129	0.233	0.387	99.52	96.2
69.7	41.9	0.102	3.89	0.066	53.15	0.067	0.252	0.394	99.82	96.1
69.7	40.87	0.105	3.8	0.069	53.9	0.142	0.219	0.394	99.49	96.2
69.7	41.2	0.108	5.33	0.07	52.44	0.112	0.223	0.39	99.87	94.6
69.7	40.93	0.084	6.97	0.088	51.21	0.116	0.207	0.382	99.98	92.9
69.7	40.21	0.054	10.07	0.14	49.23	0.096	0.19	0.372	100.35	89.7
69.7	39.85	0.061	12.72	0.199	46.54	0.118	0.16	0.342	99.99	86.7
69.7	41.51	0.119	4.98	0.047	52.64	0.14	0.228	0.395	100.06	95
69.7	40.43	0.103	9.65	0.119	48.94	0.122	0.268	0.355	99.99	90
69.7	40.55	0.129	7.92	0.107	50.48	0.117	0.256	0.357	99.92	91.9
69.7	41.34	0.146	3.92	0.071	53.63	0.138	0.249	0.393	99.89	96.1
69.7	41.34	0.121	3.91	0.068	53.68	0.121	0.249	0.389	99.88	96.1
69.7	41.6	0.091	4.18	0.071	53.33	0.145	0.182	0.384	99.99	95.8
23.62	41.7	0.198	4.3	0.062	52.63	0.105	0.273	0.382	99.65	95.6
23.62	41.75	0.189	4.37	0.071	52.7	0.113	0.292	0.379	99.86	95.6
23.62	41.89	0.19	4.37	0.065	52.67	0.107	0.277	0.383	99.95	95.5
23.62	41.78	0.199	4.42	0.07	52.75	0.11	0.275	0.384	99.99	95.5
23.62	41.47	0.193	5.71	0.086	51.7	0.117	0.289	0.375	99.94	94.2
23.62	40.99	0.176	7.98	0.093	50.04	0.122	0.297	0.372	100.06	91.8
23.62	40.51	0.154	10.21	0.13	48.34	0.108	0.267	0.379	100.07	89.4
23.62	40.26	0.062	12.22	0.181	46.4	0.096	0.215	0.373	99.78	87.1
23.62	41.77	0.165	4.41	0.053	52.53	0.151	0.264	0.386	99.72	95.5
23.62	41.69	0.16	4.45	0.073	52.62	0.164	0.268	0.379	99.81	95.5
23.62	41.8	0.165	4.53	0.064	52.43	0.156	0.271	0.367	99.78	95.4
23.62	41.59	0.182	5.05	0.072	52	0.135	0.295	0.377	99.7	94.8
23.62	41.36	0.181	7.38	0.09	49.65	0.13	0.298	0.376	99.46	92.3
23.62	41.07	0.146	8.62	0.111	48.91	0.124	0.247	0.371	99.6	91
23.62	40.93	0.13	9.72	0.119	47.97	0.102	0.243	0.378	99.59	89.8
23.62	40.55	0.132	11.22	0.132	46.75	0.143	0.254	0.367	99.55	88.1
23.62	41.7	0.128	4.87	0.073	52.27	0.117	0.226	0.394	99.77	95
23.62	41.02	0.111	8	0.108	50.04	0.121	0.223	0.376	100	91.8
23.62	40.4	0.122	9.97	0.113	48.74	0.123	0.241	0.365	100.08	89.7
23.62	40.05	0.092	11.24	0.138	47.23	0.132	0.259	0.357	99.5	88.2
23.62	40.3	0.069	11.85	0.171	46.65	0.12	0.205	0.361	99.69	87.5
23.62	40.96	0.074	9.17	0.121	48.8	0.12	0.225	0.364	99.81	90.5
23.62	40.73	0.07	10.23	0.121	48.08	0.112	0.185	0.367	99.89	89.3
23.62	40.37	0.069	12.13	0.164	46.6	0.121	0.207	0.372	100.03	87.3
23.62	41.78	0.123	5.12	0.072	51.98	0.152	0.217	0.381	99.82	94.8
23.62	41.27	0.115	7.77	0.097	49.9	0.12	0.2	0.388	99.85	92
23.62	40.95	0.136	10.05	0.124	47.75	0.112	0.244	0.375	99.73	89.4
23.62	41.8	0.165	4.86	0.083	52.04	0.137	0.287	0.398	99.76	95
23.62	41.85	0.146	4.59	0.083	52.47	0.132	0.268	0.403	99.94	95.3
23.62	40.65	0.149	9.75	0.116	48.46	0.126	0.259	0.375	99.89	89.9
23.62	40.17	0.142	11.63	0.132	47.23	0.105	0.254	0.364	100.02	87.9
23.62	41.26	0.132	4.88	0.08	52.26	0.144	0.224	0.382	99.36	95
23.62	41.54	0.084	4.21	0.061	53.09	0.107	0.202	0.394	99.69	95.7
23.62	41.21	0.109	4.76	0.081	53.46	0.147	0.183	0.379	100.33	95.2
23.62	40.87	0.082	4.85	0.064	53.48	0.131	0.201	0.384	100.05	95.2
23.62	40.95	0.067	8.36	0.107	49.84	0.125	0.19	0.375	100.01	91.4
23.62	40.61	0.074	9.51	0.118	48.68	0.128	0.215	0.371	99.71	90.1
23.62	40.32	0.062	11.74	0.16	46.94	0.103	0.207	0.366	99.9	87.7
23.62	41.35	0.094	5.38	0.092	52.25	0.098	0.214	0.38	99.86	94.5
23.62	41.13	0.12	5.16	0.075	52.66	0.142	0.193	0.368	99.85	94.8
23.62	41.24	0.12	5.16	0.072	52.6	0.117	0.187	0.383	99.87	94.8
23.62	41.1	0.138	5.9	0.094	52.08	0.154	0.177	0.376	100.02	94
23.62	40.83	0.098	7.77	0.104	50.59	0.117	0.163	0.378	100.02	92.1
23.62	40.13	0.13	8.31	0.115	50.51	0.13	0.195	0.38	99.9	91.5
23.62	40.57	0.101	7.89	0.118	50.62	0.078	0.169	0.383	99.93	92
23.62	39.89	0.112	9.66	0.121	48.47	0.136	0.2	0.369	98.96	89.9
23.62	39.69	0.081	10.91	0.136	47.13	0.092	0.198	0.365	98.6	88.5
23.62	40.43	0.129	5.47	0.067	51.65	0.14	0.164	0.379	98.47	94.4
23.62	40.72	0.111	5.88	0.087	51.91	0.146	0.159	0.379	99.39	94
23.62	41.37	0.124	7.67	0.099	50.72	0.131	0.168	0.363	100.65	92.2
23.62	41.14	0.123	9.58	0.115	49.24	0.14	0.171	0.371	100.88	90.2
23.62	41.01	0.123	10.84	0.134	48.43	0.118	0.177	0.372	101.2	88.8
23.62	40.53	0.06	11.82	0.139	47.76	0.038	0.1	0.368	100.67	87.8
23.62	40.11	0.179	6.13	0.073	51.21	0.145	0.288	0.383	98.51	93.7
23.62	39.86	0.155	4.16	0.079	53.12	0.15	0.241	0.39	98.15	95.8
23.62	39.52	0.15	4.02	0.071	53.27	0.143	0.239	0.379	97.79	95.9
23.62	41.03	0.152	4.06	0.06	53.28	0.134	0.243	0.38	99.33	95.9
23.62	41.24	0.152	4.22	0.063	53.06	0.131	0.233	0.382	99.48	95.7
23.62	41.56	0.17	4.74	0.077	52.57	0.14	0.244	0.383	99.88	95.2
23.62	41.42	0.157	5.36	0.075	52.04	0.141	0.258	0.383	99.83	94.5
23.62	41.48	0.149	6.32	0.093	51.33	0.127	0.237	0.364	100.09	93.5
23.62	41.43	0.152	7.64	0.087	50.35	0.132	0.259	0.373	100.42	92.2
23.62	41.28	0.169	9.32	0.125	48.86	0.156	0.251	0.363	100.53	90.3
23.62	41.19	0.146	10.36	0.145	48.01	0.145	0.226	0.364	100.59	89.2
23.62	40.93	0.143	11.08	0.148	47.25	0.13	0.238	0.369	100.29	88.4
23.62	40.5	0.11	11.44	0.146	46.99	0.093	0.197	0.368	99.9	88

## Sheet: LA data
LASER ABLATION DATA
Fig. S3
Commondale olivine analyses carried out by laser ablation (wt.%)
Sample	Spot ID	CaO	Al2O3	Cr2O3
105.66	1	0.121	0.1	0.228
105.66	2	0.114	0.081	0.202
105.66	3	0.124	0.119	0.232
105.66	4	0.131	0.096	0.218
105.66	5	0.122	0.11	0.241
105.66	6	0.124	0.125	0.213
105.66	7	0.15	0.113	0.23
105.66	8	0.147	0.188	0.351
105.66	9	0.113	0.085	0.221
105.66	10	0.121	0.091	0.249
105.66	11	0.139	0.135	0.256
105.66	12	0.136	0.189	0.321
105.66	13	0.126	0.092	0.251
105.66	14	0.126	0.092	0.241
105.66	15	0.133	0.17	0.288
105.66	16	0.115	0.136	0.261
23.62	1	0.129	0.13	0.232
23.62	2	0.126	0.134	0.235
23.62	3	0.126	0.14	0.245
23.62	4	0.129	0.163	0.253
23.62	5	0.167	0.259	0.33
23.62	6	0.166	0.267	0.323
23.62	7	0.128	0.208	0.286
23.62	8	0.129	0.202	0.283
23.62	9	0.123	0.201	0.284
23.62	10	0.118	0.187	0.279
23.62	11	0.124	0.113	0.228
23.62	12	0.127	0.129	0.228
23.62	13	0.132	0.115	0.227
23.62	14	0.127	0.097	0.239
23.62	15	0.122	0.126	0.248
23.62	16	0.122	0.064	0.206
23.62	17	0.116	0.209	0.304
23.62	18	0.12	0.136	0.259
23.62	19	0.122	0.138	0.257
23.62	20	0.125	0.106	0.24
23.62	21	0.118	0.153	0.265
23.62	22	0.112	0.175	0.283
23.62	23	0.118	0.102	0.23
23.62	24	0.124	0.108	0.233
23.62	25	0.119	0.106	0.235
23.62	26	0.109	0.106	0.235
23.62	27	0.117	0.108	0.235
23.62	28	0.124	0.13	0.252
23.62	29	0.118	0.129	0.251
23.62	30	0.124	0.084	0.22
23.62	31	0.126	0.079	0.217
23.62	32	0.121	0.103	0.236
23.62	33	0.124	0.209	0.307
23.62	34	0.19	0.211	0.31
23.62	35	0.115	0.206	0.306
23.62	36	0.123	0.151	0.267
23.62	37	0.118	0.168	0.282
23.62	38	0.121	0.071	0.212
23.62	39	0.124	0.097	0.229
23.62	40	0.138	0.135	0.249
23.62	41	0.12	0.071	0.215
23.62	42	0.112	0.128	0.253
23.62	43	0.124	0.158	0.28
23.62	44	0.126	0.171	0.277
23.62	45	0.118	0.172	0.286
23.62	46	0.117	0.108	0.243
23.62	47	0.121	0.066	0.201
23.62	48	0.115	0.078	0.228
23.62	49	0.134	0.072	0.209
23.62	50	0.153	0.126	0.214
23.62	51	0.141	0.081	0.198
23.62	52	0.141	0.096	0.205
23.62	53	0.152	0.133	0.216
69.7	1	0.141	0.145	0.253
69.7	2	0.146	0.185	0.288
69.7	3	0.143	0.135	0.243
69.7	4	0.146	0.19	0.297
69.7	5	0.142	0.175	0.26
69.7	6	0.145	0.195	0.293
69.7	7	0.131	0.145	0.217
69.7	8	0.143	0.176	0.281
69.7	9	0.146	0.197	0.277
69.7	10	0.143	0.153	0.2
69.7	11	0.142	0.147	0.262
69.7	12	0.144	0.153	0.267
69.7	13	0.151	0.147	0.252
69.7	14	0.134	0.114	0.218
69.7	15	0.136	0.118	0.239
69.7	16	0.167	0.098	0.163
69.7	17	0.138	0.177	0.269
69.7	18	0.141	0.21	0.292
69.7	19	0.148	0.13	0.253
69.7	20	0.145	0.115	0.221
69.7	21	0.138	0.139	0.28
69.7	22	0.133	0.132	0.227
69.7	23	0.132	0.197	0.282
69.7	24	0.131	0.188	0.298
69.7	25	0.135	0.223	0.309
69.7	26	0.141	0.167	0.289
69.7	27	0.135	0.178	0.28
69.7	28	0.131	0.183	0.306
69.7	29	0.128	0.132	0.245
69.7	30	0.131	0.156	0.245
69.7	31	0.168	0.206	0.245
69.7	32	0.166	0.211	0.268
69.7	33	0.207	0.259	0.299
69.7	34	0.134	0.16	0.26
69.7	35	0.133	0.175	0.279
69.7	36	0.13	0.151	0.255
69.7	37	0.126	0.147	0.249
69.7	38	0.124	0.148	0.254
69.7	39	0.125	0.163	0.285
69.7	40	0.12	0.151	0.273
69.7	41	0.125	0.16	0.303
69.7	42	0.128	0.165	0.262
69.7	43	0.128	0.16	0.281
69.7	44	0.12	0.15	0.271
69.7	45	0.117	0.117	0.231
69.7	46	0.121	0.205	0.321
69.7	47	0.12	0.202	0.317
69.7	48	0.117	0.197	0.329
69.7	49	0.143	0.119	0.264
69.7	50	0.124	0.132	0.264
69.7	51	0.122	0.131	0.25
69.7	52	0.117	0.164	0.322
69.7	53	0.118	0.094	0.184
69.7	54	0.118	0.119	0.236
69.7	55	0.111	0.114	0.216
69.7	56	0.114	0.138	0.255
69.7	57	0.117	0.163	0.272
69.7	58	0.156	0.091	0.182
69.7	59	0.129	0.111	0.215
69.7	60	0.12	0.176	0.334
69.7	61	0.12	0.099	0.223
69.7	62	0.115	0.093	0.212

## Sheet: T calculation
Temperature calculation is for the rare occurance of chromite enclosed at an olivine rim
Sample 44.13
Chrome spinel wt.%
SiO2	Al2O3	FeO	MnO	MgO	CaO	TiO2	Cr2O3	NiO	Total
0.44	12.22	26.05	0.57	6.37	0.02	0.06	55.2	0.04	100.97
Olivine wt.%
SiO2	Al2O3	FeO	MnO	MgO	CaO	Cr2O3	NiO	Total	Fo
40.08	0.07	12.66	0.18	46.14	0.1	0.27	0.28	99.79	86.7
Temperature olivine-spinel = 1453			deg.C
